# Supplementary material for: Effects of elevated CO 2 and temperature on phytoplankton community biomass, species composition and photosynthesis during an autumn bloom in the Western English Channel
Source: Copernicus journal article supplement (doi:10.5194/bg-2017-510), 2017-12-04
Supplement: Supplementary file 1 [file bg-2017-510-supplement.pdf]

Supplementary material

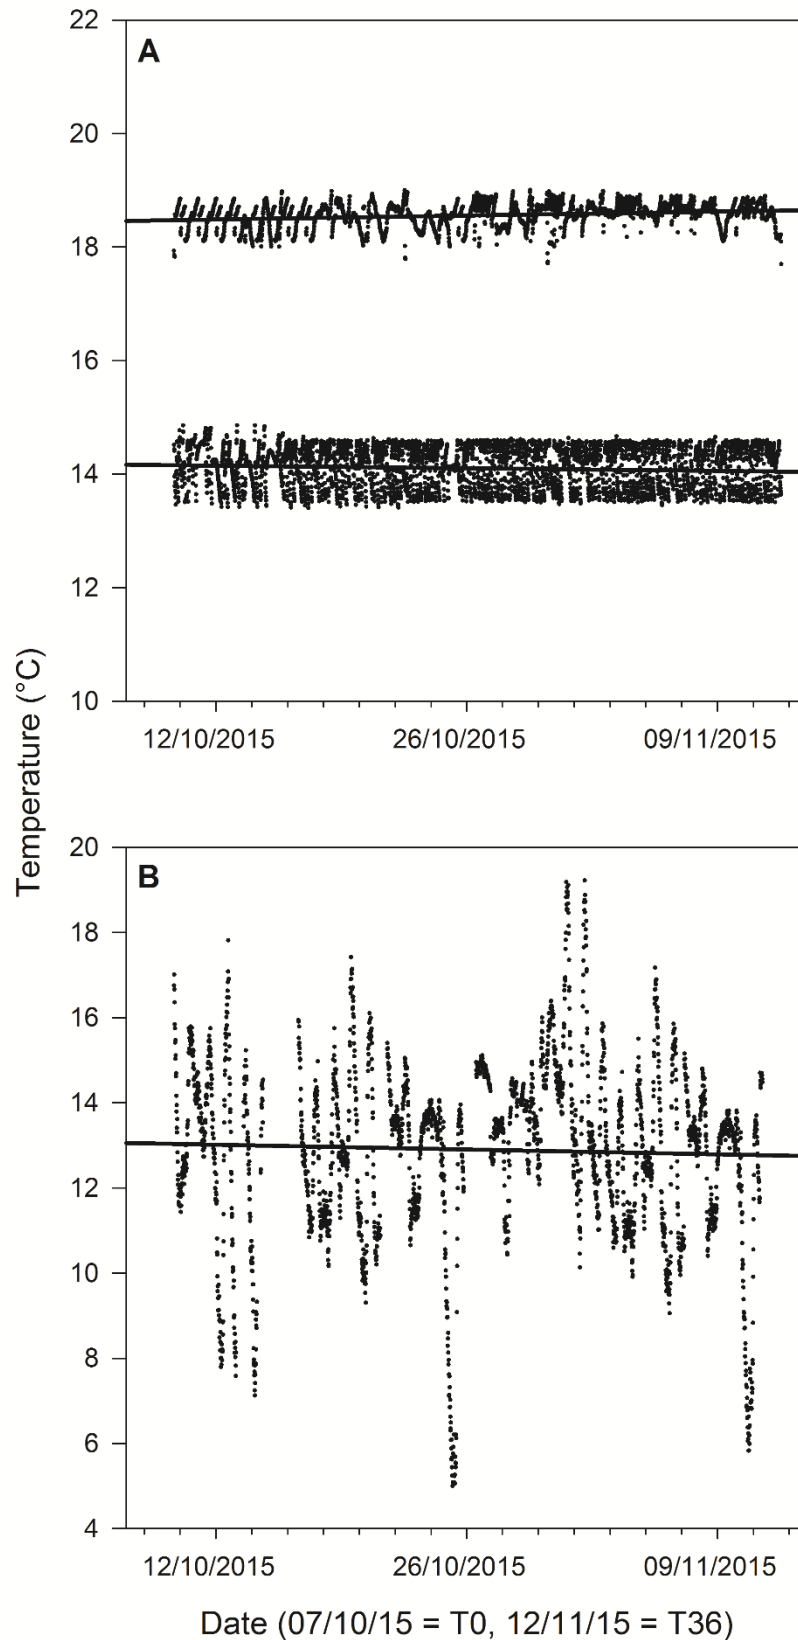

**Fig. S1.** Time course of temperature treatments throughout the experiment. Control and high CO<sub>2</sub> treatments maintained at a mean temperature of 14.1 °C ( $\pm$  0.35 sd) and the high temperature and combination treatments maintained at a mean temperature of 18.6 °C ( $\pm$  0.42 sd) (A). External ambient air temperature logged over the experimental period (B).

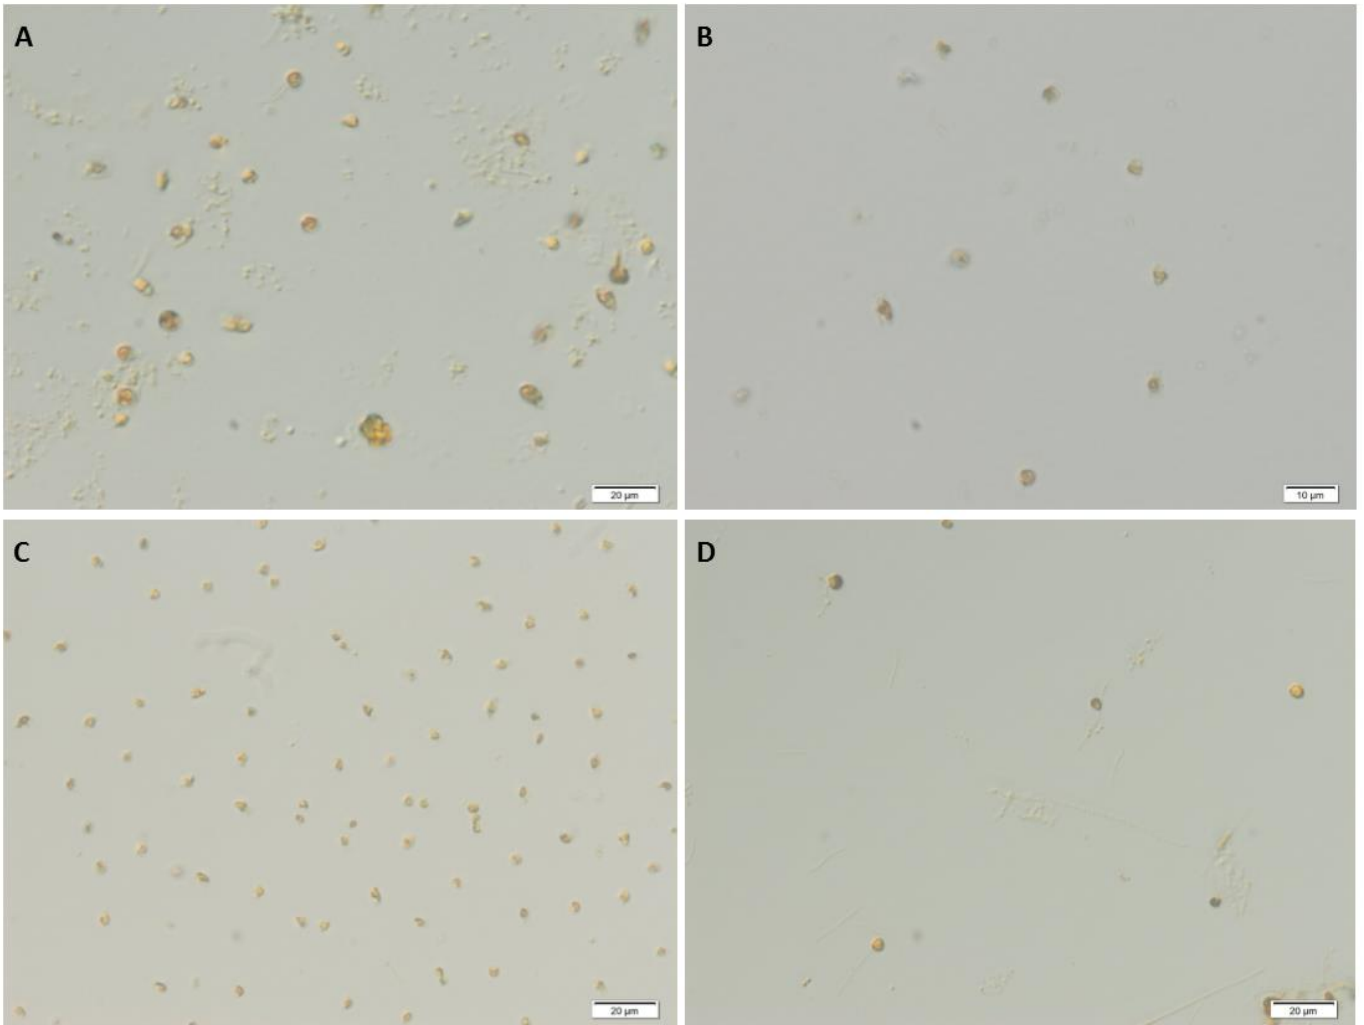

**Fig. S2.** Nanophytoplankton was the dominant group throughout the experiment between T10-T24 and remained dominant in the high temperature and high CO<sub>2</sub> treatments at T36. Large nano-flagellates observed in the control (A), smaller nano-flagellates observed in the high temperature and combination treatments (B & D) and *Phaeocystis* spp. observed in the high CO<sub>2</sub> treatment (C). Image magnification = x 300.

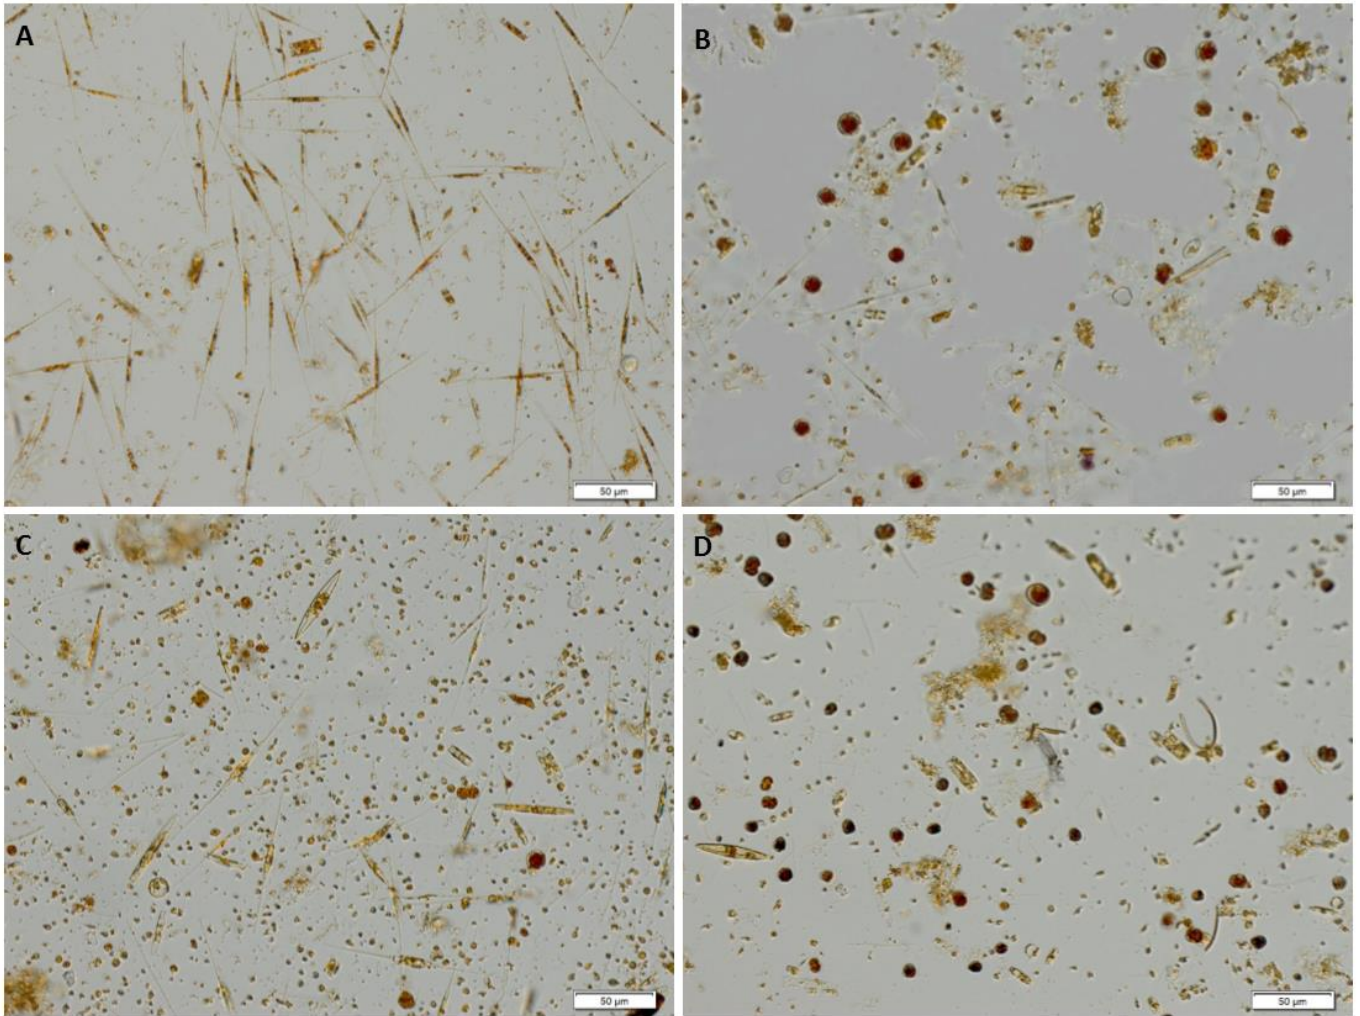

**Fig. S3.** The micro size fraction of the phytoplankton biomass at T36 showing a diatom dominated community in the control where *C. closterium* was numerically most abundant but *N. distans* dominated the biomass (A), diatoms and dinoflagellates (dominated by *N. distans*, *P. cordatum* and undet. *Gymnodiniales*) in the high temperature treatment (B), diatoms dominating in the high CO<sub>2</sub> treatment (*N. distans*, *T. subtilis* and *C. closterium*) (C) and diatoms and dinoflagellates (dominated by *N. distans* and *P. cordatum*) in the combination treatment (D).
